# Supplementary material
Source: publisher site journal article supplement (https://www.dovepress.com/article/420580)
Supplement: Supplementary file 1 [file get_supplementary_file.php]

**Supplementary Table 1: Relationship between biofilm formation and *ALS1* and *HWP1* genes**

|  | | **Biofilm formation** | | | ***X2*** | **P** |
| --- | --- | --- | --- | --- | --- | --- |
| **None or Weak**  **N=85** | **Moderate**  **N=89** | **Strong**  **N=30** |
| ***ALS1*** | **Positive** | 49 (57.6%) | 63 (70.8%) | 30 (100%) | 18.9 | <0.001** |
| **Negative** | 36 (42.4%) | 26 (29.2%) | 0 |
| ***HWP1*** | **Positive** | 59 (69.4%) | 63 (70.8%) | 30 (100%) | 12.1 | 0.002* |
| **Negative** | 26 (30.6%) | 26 (29.2%) | 0 |

**Supplementary Table 1 Symbols and Abbreviations:**

N, Number; *X2*, Chi-square test; *, Significant; **, Highly significant

**Supplementary Table 1 Legend:**

The table demonstrates the relationship between the presence of *ALS1* and *HWP1* genes and the ability of *C. albicans* isolates to produce biofilm where both genes were found significantly associated with moderate and strong biofilm production.

**Supplementary Table 2: Relationship between aspartyl proteinase production and the virulence genes *SAP2, SAP4*, and *SAP6***

|  | | **Proteinase production** | | | ***X2*** | **P** |
| --- | --- | --- | --- | --- | --- | --- |
| **None or weak**  **N=75** | **Moderate**  **N=106** | **Strong**  **N=23** |
| ***SAP2*** | **Positive** | 36 (48%) | 96 (90.6%) | 10 (43.5%) | 45.98 | <0.001** |
| **Negative** | 39 (52%) | 10 (9.4%) | 13 (56.5%) |
| ***SAP 4*** | **Positive** | 75 (100%) | 96 (90.6%) | 10 (43.5%) | 56.98 | <0.001** |
| **Negative** | 0 (0.0%) | 10 (9.4%) | 13 (56.5%) |
| ***SAP 6*** | **Positive** | 36 (48%) | 96 (90.6%) | 0 (0.0%) | 83.4 | <0.001** |
| **Negative** | 39 (52%) | 10 (9.4%) | 23 (100%) |

**Supplementary Table 2 Symbols and Abbreviations:**

N, Number; *X2*, Chi-square test; **, Highly significant

**Supplementary Table 2 Legend:**

The table demonstrates the relationship between the presence of *SAP2*, *SAP4*, and *SAP6* genes and proteinase formation in the obtained *C. albicans* isolates. Highly significant associations were found between the three genes and the ability of *C. albicans* isolates to produce aspartyl protease.

**Supplementary Table 3: Relationship between aspartyl proteinase genes and biofilm formation in *C. albicans* isolates (n = 204)**

|  | | **Biofilm formation** | | | ***X2*** | **P** |
| --- | --- | --- | --- | --- | --- | --- |
| **None or Weak**  **N=85** | **Moderate**  **N=89** | **Strong**  **N=30** |
| ***SAP2*** | **Positive** | 49 (57.6%) | 63 (70.8%) | 30 (100%) | 18.9 | <0.001** |
| **Negative** | 36 (42.4%) | 26 (29.2%) | 0 |
| ***SAP4*** | **Positive** | 75 (88.2%) | 76 (85.4%) | 30 (100%) | 4.82 | 0.09 |
| **Negative** | 10 (11.8%) | 23 (14.6%) | 0 |
| ***SAP6*** | **Positive** | 49 (57.6%) | 63 (70.8%) | 20 (66.7%) | 3.35 | 0.19 |
| **Negative** | 36 (42.4%) | 36 (29.2%) | 10 (33.3%) |

**Supplementary Table 3 Symbols and Abbreviations:**

N; number, *X2*; Chi-square test, **; highly significant.

**Supplementary Table 3 Legend:**

The table demonstrates the relationship between the presence of aspartyl proteinase genes (*SAP1*, *SAP2*, and *SAP6*) and biofilm formation in the obtained *C. albicans* isolates where the *SAP2* gene has a highly significant association with moderate and strong biofilm production (P < 0.001).
